# Supplementary material for: Single-molecule imaging reveals molecular coupling between transcription and DNA repair machinery in live cells
Source: PubMed Central journal article supplement (PMC7083905; doi:10.1038/s41467-020-15182-3), 2020-03-20
Supplement: 41467_2020_15182_MOESM3_ESM.pdf [file 41467_2020_15182_MOESM3_ESM.pdf]

## Description of Additional Supplementary Files

File Name: Supplementary Movie 1

Description: Movie showing continuous acquisition of images of *mfd-YPet ΔuvrB* cells imaged using a 514 nm laser. Integration time is 100 ms. Scale bar is 5 μm. Mfd-YPet in these cells exhibits both diffusive behavior (contributing to broad cytosolic fluorescence) and binding to RNAP resulting in distinct foci.
